# Supplementary material
Source: publisher figshare collection journal article supplement (https://karger.figshare.com/ndownloader/files/12994751)
Supplement: Supplementary file 1 [file 12994751]

Centres contributing to the LAT survey

Abertawe Bro Morgannwg University Health Board

Aintree University Hospital NHS Foundation Trust

Aneurin Bevan University Health Board

Betsi Cadwaladr University Health Board

Calderdale and Huddersfield NHS Trust

Cambridge University Hospitals NHS Foundation Trust (Addenbrooke’s)

Chesterfield Royal Hospital NHS Foundation Trust

Dartford and Gravesham NHS Trust - Darent Valley Hospital

Derby Hospitals NHS Foundation Trust

Doncaster and Bassetlaw Teaching Hospitals NHS Foundation Trust

East Lancashire Hospitals NHS Trust

East Sussex NHS Trust

Gloucestershire Hospitals NHS Foundation Trust

Guys and St. Thomas NHS Foundation Trust

Hampshire Hospitals NHS Foundation Trust

Lancashire Teaching Hospitals NHS Foundation Trust

Leeds Teaching Hospitals NHS Trust

Manchester University NHS Foundation Trust

Medway NHS Foundation Trust

NHS Greater Glasgow and Clyde (Royal Alexandra Hospital)

NHS Lanarkshire

North Bristol NHS Trust

North Tees and Hartlepool NHS Trust

Northumbria Healthcare NHS Foundation Trust

Nottingham University Hospitals NHS Trust

Oxford University Hospitals NHS Foundation Trust

Papworth Hospital NHS Foundation Trust

Pennine Acute Hospitals NHS Trust

Poole Hospital NHS Foundation Trust

Portsmouth Hospital NHS Trust

Queen Elizabeth University Hospital Glasgow

Rotherham NHS Foundation Trust

Sheffield Teaching Hospitals Foundation Trust

Sherwood Forest Hospitals NHS Foundation Trust

Taunton & Somerset NHS Foundation Trust

University Hospitals of Leicester - Glenfield Hospital

University Hospitals of North Midlands
